## Relic DNA contributes minimally to estimates of microbial diversity

2

JT Lennon<sup>1\*</sup>, SA Placella<sup>2</sup>, ME Muscarella<sup>1,3</sup>

4

<sup>1</sup>Indiana University, Department of Biology

6

<sup>2</sup>Michigan State University, W.K. Kellogg Biological Station

<sup>3</sup>University of Illinois, Department of Plant Biology

8

\* corresponding author: [lennonj@indiana.edu](mailto:lennonj@indiana.edu)

10

Extracellular or "relic" DNA is one of the largest pools of nucleic acids in the biosphere<sup>1,2</sup>. Relic DNA can influence a number of important ecological and evolutionary processes, but it may also bias estimates of microbial abundance and diversity, which has implications for understanding environmental, engineered, and host-associated ecosystems. We developed theoretical predictions from a simulation model based on sampling a species abundance distribution to assess how and when relic DNA biases estimates of microbial diversity. We then tested our predictions by quantifying relic DNA and assessing its contribution to bacterial diversity using 16S rRNA gene sequences collected from soil, sediment, water, and mammalian gut environments. On average, relic DNA made up 33 % of the total bacterial DNA pool, but exceeded 80 % in some samples. Despite its abundance, relic DNA had a minimal effect on estimates of taxonomic and phylogenetic diversity, which is consistent with model simulations where the processes regulating the compositional turnover of relic and intact DNA are at steady state. When such conditions are met, relic DNA should not bias cultivation-independent estimates of microbial diversity.

When microorganisms die, their DNA leaks into the surrounding environment. The fate of this relic DNA has important implications for evolutionary and ecological processes. For example, relic DNA can be taken up and incorporated into the genomes of some microorganisms via transformation, thereby serving as a reservoir of genetic information that can confer new traits and fitness benefits to distantly related taxa<sup>3</sup>. In addition, relic DNA is a high-quality resource containing carbon, nitrogen, and phosphorus that is consumed by a diverse array of bacteria with consequences for microbial community structure and ecosystem processes<sup>1,4</sup>.

Relic DNA also has the potential to bias cultivation-independent estimates of diversity, which are widely used for addressing questions concerning the assembly, biogeography, and functioning of microbial communities. Microbial DNA extracted from environmental and host-associated samples is not solely derived from metabolically active organisms<sup>5</sup>. A large portion of the individuals in a microbial community is dormant or dead<sup>6,7</sup>. Although nucleic acids can be temporarily retained in non-viable cells, DNA is ultimately released into the environment when individuals die from autolysis, senescence, viral infection, or predation<sup>8</sup>. Together, these sources of mortality can create large pools of relic DNA<sup>2,9</sup>. For example, there is an estimated 0.45 petagrams of relic DNA in global ocean sediments, which is 70-fold greater than the amount of DNA contained in intact cells from the same environments<sup>1</sup>. If included in cultivation-independent approaches, relic DNA could distort our understanding of the ecological and evolutionary processes that regulate the distribution, abundance, and function of microbial taxa.

The accumulation and turnover of relic DNA varies among ecosystems in ways that may bias estimates of microbial diversity. In some environments, DNA is rapidly broken down outside the cell via hydrolysis, oxidation, and UV-mediated damage<sup>2</sup>. These degradation processes are reflected by the size distribution of relic DNA, which tends to be skewed towards small fragments ranging between 100 and 500 base pairs<sup>10,11</sup>. In addition, the residence time of relic DNA is extremely short in some ecosystems. In freshwater and marine habitats, extracellular DNA turns over in less than one day<sup>12,13</sup> while plasmid DNA begins to degrade in just minutes<sup>14</sup>. In other environments, the degradation of relic DNA can be much slower. For example, DNA can bind with inorganic and organic substances in soils and sediments depending on cation availability and pH<sup>9</sup>. The resulting adsorption can increase the persistence of relic DNA by protecting it from hydrolytic enzymes<sup>15,16</sup>. In addition, relic DNA is contained in

biofilms<sup>8</sup>, and appears to be enriched in the gut mucosa of hosts with high-fat diets<sup>17</sup>. As a  
 58 result, even in systems with high DNase activity, large pools of relic DNA can accumulate<sup>18</sup>.

To date, the documented effects of relic DNA on estimates of diversity are idiosyncratic.  
 60 Even in samples with relatively large relic DNA pools, bias can be non-existent or substantial,  
 and lead to the overestimation or underestimation of diversity<sup>19,20</sup>. To delve further into this  
 62 apparent unpredictability, we developed a theoretical framework to explore how relic DNA  
 affects estimates of microbial diversity. While some variability in the effect of relic DNA may  
 64 reflect taxonomic- or ecosystems-specific features, we hypothesized that the magnitude and  
 direction of bias can be explained by the richness and evenness of sequences contained in the  
 66 relic DNA pool. We used a simulation model to identify conditions where sampling effects lead  
 to biased estimates of microbial diversity based on the size and species abundance distribution  
 68 (SAD) of the relic DNA pool. We then tested our model predictions by quantifying the  
 contribution of relic DNA on the abundance and diversity of bacterial communities in four  
 70 distinct ecosystem types, including soils, sediments, surface waters, and mammalian guts.

## 72 RESULTS

We developed a model that represents the dynamics of relic DNA. The size of the relic  
 74 DNA pool is affected by inputs associated with the death rates of microorganisms and by losses  
 associated with the degradation of relic DNA. When death rates exceed degradation rates, the  
 76 size of the relic DNA pool increases (Fig. 1a). However, a large relic DNA pool is not sufficient  
 to create bias in diversity estimation. Rather, the direction and magnitude of bias reflects the  
 78 simultaneous sampling of taxa from the species abundance distributions (SAD) associated with  
 the relic and intact communities. Using sampling-based simulations (see Methods), we found

that there was no bias in estimating the number of microbial taxa (richness) when the SAD of the intact community was similar to the SAD of the relic community (Fig. 1b-c). Such conditions are satisfied when the death rates and degradation rates are proportional among taxa. Owing to sampling effects, our simulations reveal that bias can arise when the SADs of the relic and intact communities are different. For example, our simulations predict that richness is overestimated when diversity (richness or evenness) is elevated in the relic community, which reflects the increased probability of sampling many unique taxa (Fig. 1b-c). Alternatively, richness can be underestimated when the diversity (richness or evenness) of the relic DNA pool is lower than the diversity of sequences in the intact pool (Fig. 1b-c), which reflects an increased probability of sampling a few disproportionately abundant (i.e., dominant) taxa. Such conditions should arise when processes (death and degradation) influencing the turnover of relic DNA are decoupled for different taxa in the intact and relic communities (Fig. 1a). The conditions leading to the over- or under-estimation of richness also translate into biased measurements of beta-diversity (between-samples) due to compositional changes in the relative abundances of sequences (Fig. S1). Thus, the number and equability in abundance of sequences corresponding with taxa in the relic DNA community determine bias in estimates of microbial diversity.

**Variation in relic DNA pool size** — We evaluated our model predictions by collecting samples from different ecosystem types (soil, sediment, water, and mammalian guts) that are hypothesized to vary in relic DNA turnover rates<sup>10,16</sup>. Using quantitative PCR with 16S rRNA primers, we quantified intact DNA after treating an aliquot of sample with DNase to remove relic DNA and total DNA (intact + relic) from a control aliquot of sample that was not treated with DNase (see Methods and Fig. S2). Relic DNA accounted for a substantial but variable portion of

the total bacterial DNA. The proportion of relic DNA was normally distributed (mean  $\pm$  sd =  
 104  $0.33 \pm 0.218$ ) and ranged from 0 to 0.83 across 34 samples obtained from different ecosystem  
 types (Fig. 2). These results are in line with the amount of relic DNA that has been reported in  
 106 other studies <sup>19,20,24</sup>. Even though host and environmental features associated with these habitats  
 are thought to influence relic DNA dynamics, there was only a marginally significant effect of  
 108 ecosystem type on the proportion of relic DNA (one-way ANOVA,  $F_{3,30} = 2.43$ ,  $P = 0.08$ ) <sup>2,19</sup>.  
 Nevertheless, the large average pool size and range in relic DNA provided us with the  
 110 opportunity to test our model predictions regarding the magnitude and direction of bias that relic  
 DNA should have on estimates of microbial diversity.

**Magnitude and direction of bias on microbial diversity** — We sequenced 16S rRNA genes  
 114 from the intact and total DNA pools to determine whether and to what degree relic DNA biased  
 the taxonomic and phylogenetic alpha-diversity of bacterial communities. Despite accounting for  
 116 a substantial portion of the total DNA (Fig. 2), relic DNA had no effect on estimates of richness,  
 evenness, or phylogenetic diversity (PD) (Table S1). We expressed each of these alpha-diversity  
 118 metrics as a ratio (total / intact), where values  $> 1$  represent overestimation bias and values  $< 1$   
 represent underestimation bias. Relic DNA had no effect on the diversity ratios based on the  
 120 observation that the 95 % confidence intervals overlapped with 1.0 (Fig. 3). Furthermore, the 95  
 % confidence intervals of the diversity ratios overlapped across ecosystem types, indicating that  
 122 the contribution of relic DNA to all measures of diversity was low irrespective of the microbial  
 habitat sampled. Finally, using simple linear regression, we tested our model predictions that the  
 124 magnitude of bias has the potential to increase with increasing relic DNA pool size (see Fig. 1b-  
 c). For all diversity ratios (richness, evenness, and PD), the slopes were not different from zero

( $P > 0.65$ ) and the intercepts were not different from 1.0 ( $P > 0.18$ ) (Fig. S3). These findings are consistent with simulations predicting that in order for bias to arise, there must be differences in the diversity of the intact and relic DNA pools (Fig. 1b-c).

**Contribution of relic DNA to community composition** — We estimated the effects of relic DNA on compositional diversity for the intact and total DNA pools. Principal Coordinates Analysis (PCoA) revealed that bacterial composition was strongly affected by ecosystem type (Fig. S4), which was supported by permutational multivariate analysis of variance (PERMANOVA) using both taxonomic ( $R^2 = 0.35$ ,  $F_{3,50} = 9.33$ ,  $P = 0.001$ ) and phylogenetic ( $R^2 = 0.65$ ,  $F_{3,50} = 31.8$ ,  $P = 0.001$ ) distance matrices. However, multiple lines of evidence suggest that relic DNA had no appreciable effect on the observed bacterial composition. First, the intact and total DNA pools were significantly and highly correlated with one another when we performed a Mantel test using Bray-Curtis distances, which reflect taxonomic dissimilarity ( $P = 0.001$ ,  $r = 0.959$ ), and UniFrac distances, which capture phylogenetic dissimilarity ( $P = 0.001$ ,  $r = 0.996$ ). Second, we tested for the effect of relic DNA on beta-diversity by calculating centroid distance ratios (see Methods). If the centroid distance ratio was  $> 1$ , we concluded that relic DNA inflated beta-diversity; if the distance ratio was  $< 1$ , we concluded that relic DNA homogenized beta-diversity. Relic DNA had no effect on the centroid distance ratios based on the observation that the 95 % confidence intervals overlapped with 1.0 (Fig. 4). Furthermore, the 95 % confidence intervals for the centroid distance ratios overlapped across ecosystem types, indicating that the contribution of relic DNA to beta-diversity was unaffected by different taxa or environmental conditions in the distinct microbial habitats. Last, we used simple linear regression to test our model predictions that bias in estimates of community composition would

increase with increasing relic DNA pool size (see Fig. S1). The proportion of relic DNA in a sample had no effect on the slopes for centroid distance ratios regardless of whether they were calculated using taxonomic ( $P = 0.48$ ) or phylogenetic ( $P = 0.75$ ) distance matrices. Similarly, the intercepts for these regression relationships were not significantly different from 1 ( $P > 0.3$ ) (Fig. S5). These findings are consistent with simulations predicting that in order for bias to arise, there must be differences in the diversity between the intact and relic DNA pools (Fig. S1).

## DISCUSSION

Rarely, if ever, are biological communities completely censused. As a result, estimates of diversity are often based on incomplete sampling, which introduces uncertainty and potential bias. For microbiologists using cultivation-independent approaches, diversity estimation is further complicated by the accumulation and persistence of relic DNA, which may have an abundance distribution that is distinct from that of the sequences contained in viable cells. In such cases, our simulation models predict that microbial diversity can be overestimated or underestimated depending on the size, richness, and evenness of the relic DNA pool (Fig. 1b-c). We tested our model predictions by analyzing the intact and total DNA in a range of ecosystems with relic DNA pool sizes that could bias estimates of bacterial diversity. We found that relic DNA had minimal to no effect on commonly estimated measures of taxonomic and phylogenetic diversity, suggesting that the compositional turnover of relic and intact DNA may often be at steady state. In the following sections, we discuss scenarios where relic DNA should and should not lead to bias in the estimation of microbial diversity.

Relic DNA should have no effect on estimates of microbial diversity when the composition of sequences in the intact DNA pool and the relic DNA pool are at steady state.



Such conditions will be met when the taxon-specific production of relic DNA (via death) equals the taxon-specific loss of relic DNA (via degradation), regardless of whether the absolute rates of these processes are fast or slow (Fig. 1). When these assumptions are met, the diversity of the relic and intact DNA pools should be identical. Therefore, sampling from the relic DNA pool should not bias estimates of diversity in the intact DNA pool, even if relic DNA makes up a large portion of the total DNA pool. Despite sampling a range of habitats with attributes that reportedly affect the turnover of relic DNA, our data suggest that measures of taxonomic and phylogenetic alpha- and beta-diversity were unbiased by relic DNA even when it accounted for > 80 % of the total DNA (Figs. S3 and S5). Similar findings are reported elsewhere. For example, there was no bias in the estimate of bacterial richness for a soil sample that contained nearly 80 % relic DNA <sup>20</sup>. Similarly, more than 90 % of the DNA recovered in lung tissues was found to be sensitive to DNase, yet the diversity of sequenced bacteria in the enzymatically treated and untreated samples was the same <sup>19</sup>.

Nevertheless, our model predicts that bias can arise when there are different species abundance distributions (SADs) for intact and relic DNA pools (Fig. 1b-c, Fig. 2S). These predictions are consistent with some reports demonstrating that relic DNA can inflate estimates of bacterial and fungal diversity <sup>20,31</sup>. While most studies have emphasized the potential to overestimate diversity, our model predicts that relic DNA pools that are low in richness or dominated by only a few taxa can also lead to the underestimation of richness, which has been observed in some samples <sup>20</sup>. Such findings suggest that the compositional turnover of intact and relic DNA pools can become decoupled. There are a number of scenarios where deviations from steady-state conditions may arise. First, the DNA associated with certain taxa may be preferentially preserved if it is contained in soil aggregates or biofilms that physically protect

relic DNA from enzymes or other conditions that would otherwise lead to more rapid

196 degradation. Second, the immigration of taxa that are poorly adapted to local conditions may die  
and enrich the relic DNA pool with sequences that are dissimilar to sequences found in the local  
198 community. A similar effect could arise when dead bacteria are transported across ecosystem  
boundaries, a phenomenon that occurs, for example, when marine snow is exported from surface  
200 waters to marine sediments <sup>32</sup>. Furthermore, any abiotic or biotic perturbation that removes a  
substantial amount of living biomass could lead to divergence in the composition of sequences in  
202 the intact and relic DNA pool. For example, virulent phage can dramatically reduce the  
abundance of bacterial prey and in the process release large quantities of DNA into the  
204 environment, which could bias estimates of microbial diversity <sup>31</sup>. Last, although not fully  
explored here, shifts in rank abundance of taxa that are independent of richness or  
206 evenness could results in biased estimates of microbial diversity.

Our understanding of the microbial biosphere has been transformed by the development  
208 and application of molecular-based cultivation-independent techniques. The ability to rapidly  
obtain millions of gene sequences from a range of environments has yielded valuable insight into  
210 the processes that regulate community assembly and function <sup>25,26</sup>, and has also paved the way  
for the discovery of new metabolisms <sup>27</sup>, tests for unifying patterns of biodiversity <sup>28</sup>, and an  
212 updated tree of life <sup>29</sup>. There are limitations, however, associated with culture-independent  
techniques, which include inefficient nucleic-acid extraction methods <sup>29</sup> and "universal" primers  
214 that over-represent some taxonomic groups while overlooking others <sup>30</sup>. Sequencing of relic  
DNA is another important concern, which can potentially lead to the overestimation or  
216 underestimation of microbial diversity. However, this bias requires the decoupling of processes  
that regulate the compositional turnover of the relic and intact DNA pools. While some recent

evidence suggests this can arise<sup>20</sup>, our results from diverse ecosystems suggest that relic DNA contributes minimally to the characterization of microbial community structure.

## METHODS

**Relic DNA Model** — We used sampling-based simulations to model the mixing of intact and relic DNA pools. For each simulation, we sampled a regional species pool consisting of 10,000 taxa with a lognormal abundance distribution<sup>21</sup>. The intact community consisted of 1,000,000 individuals sampled from this regional pool. We then combined this intact community with a relic community at proportions from 0.01 to 0.96. In the first set of simulations, we altered the evenness of the regional pool from which the relic community was sampled. We altered the evenness by changing the scale parameter of the lognormal distribution. To decrease the evenness of the relic DNA pool, we increased the scale parameter from 0.98 to 2. To increase the evenness of the relic DNA pool, we decreased the parameter from 0.98 to 0.1. In the second set of simulations, we altered the richness of the regional pool from which the relic community was sampled. We altered richness by increasing the magnitude of the regional pool while maintaining the order of species and the scale parameter of the lognormal distribution. To increase the richness of the relic DNA pool, we increased the size of the regional pool from 10,000 to 50,000 taxa. To decrease the richness of the relic DNA pool, we decreased the size of the regional pool from 10,000 to 5,000 taxa. After mixing the intact and relic communities for both simulations, we rarified the total community to 10,000 observations and calculated richness and Bray-Curtis distances to estimate compositional differences between the intact and total DNA pools. To estimate contribution of relic DNA to diversity, we calculate ratios (total DNA / intact DNA) for

richness and Bray-Curtis distances. All simulations and estimations were performed in the R  
 242 statistic environment (v 3.3.2)<sup>46</sup> using the vegan package as well as custom functions.

244 **Sample collection and DNA pools**— We collected samples from a range of environmental and  
 host-associated ecosystems. First, we sampled sediments and surface water from lakes near the  
 246 Michigan State University, W.K. Kellogg Biological Station (KBS) in Hickory Corners,  
 Michigan, USA. Soils were sampled from the main sites and surrounding areas at the KBS Long-  
 248 Term Ecological Research site<sup>33</sup>. We also collected fresh feces as representative gut microbiome  
 samples from cows, dogs, horses, rabbits, and humans. In each of these ecosystem types, we  
 250 obtained samples from 6 - 8 independent sites. After transporting samples to the laboratory, we  
 added DNase to an aliquot of a sample to remove relic DNA. DNase is commonly used to  
 252 eliminate extracellular DNA in environmental samples while not affecting the integrity of living  
 cells<sup>22,23</sup>. We assume that the remaining "intact DNA" from this aliquot was contained in  
 254 potentially viable cells. We used another aliquot without DNase from the same sample as a  
 control, which we refer to as "total DNA". For aqueous samples, we filtered 250 mL samples  
 256 onto 47 mm 0.2 µm Supor filter (Pall Corporation) at 10 mm Hg of vacuum pressure, cut the  
 filter in half and randomly assigned one half to a DNase treatment and used the other half as the  
 258 control. For non-aquatic samples (gut, sediment, and soils), 0.25 g aliquots were transferred into  
 two 2 mL microcentrifuge tubes. We then added 440 µL of a DNase buffer (382.5 µL  
 260 molecular-grade H<sub>2</sub>O, 5 µL of 1 M MgCl<sub>2</sub>, 2.5 µL of bovine serum albumin BSA [10 mg/mL],  
 and 50 µL of 0.5 M Tris HCl [pH = 7.5]) to the microcentrifuge tubes and randomly assigned  
 262 one to a DNase treatment and the other to a DNase control. For samples receiving the DNase  
 treatment, we added 40 µL of 10 U/µL DNase (Roche, Indianapolis, IN) and 20 µL of ultrapure

H<sub>2</sub>O to the 2 mL microcentrifuge containing buffer while the control received 60 µL of ultrapure H<sub>2</sub>O. We measured pH using a micro pH probe (Orion 9110DJWP, Thermo Scientific) and adjusted to 7.3 - 7.7, which is in the optimum range for DNase. We then incubated the microcentrifuge tubes horizontally at 37 °C for one hour to ensure proper mixing and enzymatic activity. To stop the reaction, we added 25 µL of 0.5 M EDTA to each tube and incubated at 75 °C for 10 min. The contents of the microcentrifuge tubes were then transferred to 15 mL Falcon tubes containing 0.1 mm glass beads. We added 1 mL cetyltrimethylammonium bromide (1X, CTAB) buffer to each Falcon tube to precipitate proteins, lipids, and polysaccharides. We then initiated DNA extraction by adding 1 mL of phenol:chloroform:isoamylalcohol (25:24:1) to the 15 mL Falcon tube. After vortexing for 10 min, we centrifuged the samples at 7,000 x g for 10 min. We transferred the top aqueous layer to a new tube, added an equal volume of chloroform:isoamylalcohol (24:1), and centrifuged at 7,000 x g for 5 min. We transferred 400 µL of the top aqueous layer to a new sterile 1.5 mL tube and isolated DNA using the MO BIO PowerLyzer PowerSoil DNA Isolation Kit. The resulting purified DNA was stored at -80 °C.

**Contribution of relic DNA to bacterial abundance** — We used 16S rRNA gene copy numbers generated from quantitative PCR (qPCR) assays<sup>34</sup> to estimate the proportion of relic DNA in a sample as 1 - (intact DNA / total DNA). The 30 µL qPCR reactions contained 1 µL of DNA template, 0.5 µL of each primer (10 µmol/L), 14.5 µL of nuclease-free H<sub>2</sub>O, and 13.5 µL of 5 Prime 2.5x Real MasterMix SYBR ROX (5 Prime, Inc. Gaithersburg, MD, USA). We amplified a 200 base-pair fragment of the 16S rRNA gene with Eub 338 (forward) and Eub518 (reverse) primers<sup>35</sup>. PCR assays were performed with an Eppendorf Mastercycler Realplex<sup>2</sup> system using previously reported thermal cycle conditions<sup>35</sup>. We generated qPCR standards from bacterial genomic DNA (*Micrococcus* sp.) using the TOPO TA Cloning Kit (Invitrogen). We extracted

plasmids from transformed cells<sup>36</sup>, and used the M13 forward and reverse primers to generate PCR products. The PCR products were quantified and used to generate a standard curve capturing a range of  $10^2 - 10^7$  gene copies per  $\mu\text{L}$ . The coefficients of determination ( $r^2$ ) for our assays ranged from 0.96 and 0.99, while amplification efficiencies fell between 93 and 99 %. Based on melting curve analyses, we found no evidence for primer dimers or non-specific amplification.

### **Contribution of relic DNA to bacterial diversity**

*Community sequencing* — We estimated the contribution of relic DNA to bacterial diversity using high-throughput sequencing of the 16S rRNA gene. Specifically, we amplified the V4 region of the 16S rRNA gene from the intact and total DNA pools of each sample using barcoded primers (515F and 806R) designed to work with the Illumina MiSeq platform<sup>37</sup>. We cleaned the sequence libraries using the AMPure XP purification kit, quantified the resulting products using the QuantIt PicoGreen kit (Invitrogen), and pooled libraries at equal molar ratios (final concentration: 20 ng per library). We then sequenced the pooled libraries with the Illumina MiSeq platform using paired end reads (Illumina Reagent Kit v2, 500 reaction kit) at the Indiana University Center for Genomics and Bioinformatics Sequencing Facility. Paired-end raw 16S rRNA sequence reads were assembled into contigs using the Needleman algorithm<sup>38</sup>. We obtained a total of 12,916,632 16S rRNA sequences from 42 samples representing 21 sites. After quality trimming with a moving average quality score (window 50 bp, minimum quality score 35), we aligned the sequences to the Silva Database (version 123) using the Needleman algorithm. Chimeric sequences were removed using the UCHIME algorithm<sup>39</sup>. After this filtering, there was an average ( $\pm$  SEM) of  $222,701 \pm 9,560$  sequences per site. We created operational taxonomic units (OTUs) by first splitting the sequences based on taxonomic class

(using the RDP taxonomy) and then binning sequences into OTUs based on 97% sequence similarity. Our depth of sequencing led to a high degree of coverage across samples (minimum Good's Coverage = 0.98). For phylogenetic analysis, we picked representative sequences for each OTU by using the most abundant unique sequence. We used FastTree<sup>40</sup> to generate a phylogenetic tree from the representative sequences using the generalized time-reversible model of nucleotide evolution. We calculated phylogenetic distances using weighted UniFrac distances<sup>41</sup>. All initial sequence processing was completed using the software package mothur (version 1.38.1)<sup>42</sup>.

*Alpha Diversity* — We estimated the effects of relic DNA on richness, evenness, and phylogenetic diversity for the intact and total DNA pools with a sample. To estimate the number of OTUs (i.e., richness), we used a resampling approach that subsampled each sample to an equal number of sequences per sample and summed the number of OTUs that were represented<sup>43</sup>. Briefly, we subsampled to 30,000 observations, resampled 999 additional times, and then calculated the average richness estimates ( $\pm$  SEM) for each sample. To estimate the equitability in abundance among taxa in a sample (evenness), we used the same resampling approach and calculated average evenness estimates ( $\pm$  SEM) using Simpson's Evenness index<sup>44</sup>. To test whether relic DNA affected the phylogenetic diversity within a sample, we subsampled communities to 30,000 observations and then calculated Faith's *D* statistic, which sums the branch lengths for each species found in a sample from the root to the tip of the phylogenetic tree<sup>45</sup>. All estimations were performed in the R statistic environment (v 3.3.2)<sup>46</sup> using the vegan, ape, ade4, picante, and plyr packages, along with custom functions.

*Beta Diversity* — We estimated the effects of relic DNA on between-sample (i.e., beta) diversity

by comparing the taxonomic and phylogenetic diversity of bacterial communities in the intact and total DNA pools. First, we conducted a Principal Coordinates Analysis (PCoA) on log<sub>10</sub>-transformed relative abundance data to visualize the effects of relic DNA removal (via DNase treatment) on bacterial community composition within and among ecosystem types. The PCoA was performed with Bray-Curtis and UniFrac distances to assess taxonomic and phylogenetic effects, respectively. In addition, we used PERMANOVA to test for differences in taxonomic and phylogenetic composition based on ecosystem type for the total DNA pool. Second, we conducted a Mantel test to assess the correlation between the community resemblance matrices (either Bray-Curtis or UniFrac) represented by the intact and total DNA pools. Last, we tested whether relic DNA altered beta-diversity within an ecosystem type by comparing centroid distances. To calculate this metric of sample dispersion, we determined the centroid from a PCoA with either Bray-Curtis or UniFrac distances for the total DNA pool for all sites within a given ecosystem type. We then measured the Euclidean distances between the centroid and all samples (total and intact) to determine the centroid distances.

## ACKNOWLEDGMENTS

We acknowledge constructive feedback from KD Webster, RZ Moger-Reischer, EK Hall, NI Wisnoski, and WR Shoemaker. We thank S. Kuenzel and B.K. Lehmkuhl for technical support. This work was supported by the USDA National Institute of Food and Agriculture Grant 2011-67019-3022 (JTL), the National Science Foundation Dimensions of Biodiversity Grant 1442246 (JTL), and US Army Research Office Grant W911NF-14-1-0411 (JTL). All code and data used in this study can be found in a public GitHub repository



358 (<https://www.github.com/LennonLab/relicDNA>) and the NCBI SRA.

360

## REFERENCES

- 362 1 Dell'Anno, A. & Danovaro, R. Extracellular DNA plays a key role in deep-sea ecosystem  
functioning. *Science* **309**, 2179-2179 (2005).
- 364 2 Torti, A., Lever, M. A. & Jorgensen, B. B. Origin, dynamics, and implications of  
extracellular DNA pools in marine sediments. *Mar. Genomics* **24**, 185-196,  
366 doi:10.1016/j.margen.2015.08.007 (2015).
- 3 3 Redfield, R. J. Genes for breakfast - the have-your-cake-and-eat-it-too of bacterial  
368 transformation. *J. Hered.* **84**, 400-404 (1993).
- 4 4 Lennon, J. T. Diversity and metabolism of marine bacteria cultivated on dissolved DNA.  
370 *Appl. Environ. Microbiol.* **73**, 2799-2805 (2007).
- 5 5 Klein, D. A. Microbial communities in nature: a postgenomic perspective. *Microbe* **2**,  
372 591-595 (2007).
- 6 6 Luna, G. M., Manini, E. & Danovaro, R. Large fraction of dead and inactive bacteria in  
374 coastal marine sediments: Comparison of protocols for determination and ecological  
significance. *Appl. Environ. Microbiol.* **68**, 3509-3513 (2002).
- 376 7 Lennon, J. T. & Jones, S. E. Microbial seed banks: the ecological and evolutionary  
implications of dormancy. *Nat. Rev. Microbiol.* **9**, 119-130 (2011).
- 378 8 Vorkapic, D., Pressler, K. & Schild, S. Multifaceted roles of extracellular DNA in  
bacterial physiology. *Curr. Genet.* **62**, 71-79 (2016).
- 380 9 Levy-Booth, D. J. *et al.* Cycling of extracellular DNA in the soil environment. *Soil Biol.*  
*Biochem.* **39**, 2977-2991 (2007).

382 10 Deflaun, M. F., Paul, J. H. & Jeffrey, W. H. Distribution and molecular-weight of  
dissolved DNA in subtropical estuarine and oceanic environments. *Mar. Ecol. Prog. Ser.*  
384 **38**, 65-73 (1987).

11 Beebee, T. J. C. Identification and analysis of nucleci acids in natural freshwaters. *Sci.*  
386 *Total. Env.* **135**, 123-129 (1993).

12 Paul, J. H., Jeffrey, W. H., David, A. W., Deflaun, M. F. & Cazares, L. H. Turnover of  
388 extracellular DNA in eutrophic and oligotrophic freshwater environments of southwest  
Florida. *Appl. Environ. Microbiol.* **55**, 1823-1828 (1989).

390 13 Dell'Anno, A. & Corinaldesi, C. Degradation and turnover of extracellular DNA in  
marine sediments: Ecological and methodological considerations. *Appl. Environ.*  
392 *Microbiol.* **70**, 4384-4386 (2004).

14 Deflaun, M. F. & Paul, J. H. Detection of exogenous gene-sequences in dissolved DNA  
394 from aquatic environments. *Microb. Ecol.* **18**, 21-28 (1989).

15 Romanowski, G., Lorenz, M. G. & Wackernagel, W. Adsorption of plasmid DNA to  
396 mineral surfaces and protection against DNase-1. *Appl. Environ. Microbiol.* **57**, 1057-  
1061 (1991).

398 16 Morrissey, E. M. *et al.* Dynamics of extracellular DNA decomposition and bacterial  
community composition in soil. *Soil Biol. Biochem.* **86**, 42-49 (2015).

400 17 Sun J, Wang P. & Shi, Y. High fat diet decrease diversity of extracellular DNA of mice  
gut microbiota. *FASEB J.* **30**, ib204 (2016).

402 18 Corinaldesi, C., Barucca, M., Luna, G. M. & Dell'Anno, A. Preservation, origin and  
genetic imprint of extracellular DNA in permanently anoxic deep-sea sediments. *Mol.*  
404 *Ecol.* **20**, 642-654 (2011).

19 Pezzulo, A. A. *et al.* Abundant DNase I-sensitive bacterial DNA in healthy porcine lungs  
406 and its implications for the lung microbiome. *Appl. Environ. Microbiol.* **79**, 5936-5941  
(2013).

408 20 Carini, P. *et al.* Relic DNA is abundant in soil and obscures estimates of soil microbial  
diversity. *Nat. Microbiol.* **2**, 16242 (2017).

410 21 Shoemaker, W. R., Locey, K. J. & Lennon, J. T. A macroecological theory of microbial  
biodiversity. *Nat. Ecol. Evol.* **1** (2017).

412 22 Dell'Anno, A., Bompadre, S. & Danovaro, R. Quantification, base composition, and fate  
of extracellular DNA in marine sediments. *Limnol. Oceanogr.* **47**, 899-905 (2002).

414 23 Villarreal, J. V., Jungfer, C., Obst, U. & Schwartz, T. DNase I and proteinase K eliminate  
DNA from injured or dead bacteria but not from living bacteria in microbial reference  
416 systems and natural drinking water biofilms for subsequent molecular biology analyses.  
*J. Microbiol. Methods* **94**, 161-169 (2013).

418 24 Corinaldesi, C., Danovaro, R. & Dell'Anno, A. Simultaneous recovery of extracellular  
and intracellular DNA suitable for molecular studies from marine sediments. *Appl.*  
420 *Environ. Microbiol.* **71**, 46-50 (2005).

25 Lindstrom, E. S. & Langenheder, S. Local and regional factors influencing bacterial  
422 community assembly. *Environ. Microbiol. Rep.* **4**, 1-9 (2012).

26 Aanderud, Z. T., Jones, S. E., Fierer, N. & Lennon, J. T. Resuscitation of the rare  
424 biosphere contributes to pulses of ecosystem activity. *Front. Microbiol.* **6**, (2015).

27 Beja, O. *et al.* Bacterial rhodopsin: Evidence for a new type of phototrophy in the sea.  
426 *Science* **289**, 1902-1906 (2000).

- 28 Locey, K. J. & Lennon, J. T. Scaling laws predict global microbial diversity. *Proc. Natl.*  
428 *Acad. Sci. U.S.A.* **113**, 5970-5975 (2016).
- 29 Feinstein, L. M., Sul, W. J. & Blackwood, C. B. Assessment of bias associated with  
430 incomplete extraction of microbial DNA from soil. *Appl. Environ. Microbiol.* **75**, 5428-  
5433 (2009).
- 432 30 Klindworth, A. *et al.* Evaluation of general 16S ribosomal RNA gene PCR primers for  
classical and next-generation sequencing-based diversity studies. *Nucleic Acids Res.* **41**,  
434 e1 (2013).
- 31 Corinaldesi, C., Tangherlini, M., Luna, G. M. & Dell'Anno, A. Extracellular DNA can  
436 preserve the genetic signatures of present and past viral infection events in deep  
hypersaline anoxic basins. *Proc. R. Soc. Lond. Biol.* **281**, 20133299 (2014).
- 438 32 Azam, F. & Long, R. A. Oceanography - Sea snow microcosms. *Nature* **414**, 497-498,  
(2001).
- 440 33 Hamilton, S. K., Doll, J. E. & Robertson, G. P. *The ecology of agricultural landscapes:*  
*Long-term research on the path to sustainability.* (Oxford University Press, 2015).
- 442 34 Lau, J. A. & Lennon, J. T. Evolutionary ecology of plant-microbe interactions: soil  
microbial structure alters selection on plant traits. *New Phytol.* **192**, 215-224 (2011).
- 444 35 Fierer, N., Jackson, J. A., Vilgalys, R. & Jackson, R. B. Assessment of soil microbial  
community structure by use of taxon-specific quantitative PCR assays. *Appl. Environ.*  
446 *Microbiol.* **71**, 4117-4120 (2005).
- 36 Sambrook, J. & Russell, D. W. *Molecular cloning: a laboratory manual.* (Cold Spring  
448 Harbor Laboratory Press, 2001).

37 Caporaso, J. G. *et al.* Ultra-high-throughput microbial community analysis on the  
450 Illumina HiSeq and MiSeq platforms. *ISME J.* **6**, 1621-1624 (2012).

38 Needleman S.B. & C.D., W. A general method applicable to the search for similarities in  
452 the amino acid sequence of two proteins. *J. Mol. Biol.* **48**, 443-453 (1970).

39 Edgar, R. C., Haas, B. J., Clemente, J. C., Quince, C. & Knight, R. UCHIME improves  
454 sensitivity and speed of chimera detection. *Bioinformatics* **27**, 2194-2200 (2011).

40 Price, M. N., Dehal, P. S. & Arkin, A. P. FastTree 2-approximately maximum-likelihood  
456 trees for large alignments. *PLOS ONE* **5**, (2010).

41 Lozupone, C. A. & Knight, R. Species divergence and the measurement of microbial  
458 diversity. *FEMS Microbiol. Rev.* **32**, 557-578 (2008).

42 Schloss, P. D. *et al.* Introducing mothur: open-source, platform-independent, community-  
460 supported software for describing and comparing microbial communities. *Appl. Environ. Microbiol.* **75**, 7537-7541 (2009).

462 43 Muscarella, M. E., Jones, S. E. & Lennon, J. T. Species sorting along a subsidy gradient  
alters community stability. *Ecology* (2016).

464 44 Smith, B. & Wilson, J. B. A consumer's guide to evenness indices. *Oikos* **76**, 70-82  
(1996).

466 45 Faith, D. P. Conservation evaluation and phylogenetic diversity. *Biol. Conserv.* **61**, 1-10  
(1992).

468 46 R Core Development Team R: A language and environment for statistical computing,  
reference index version 2.8.1. R Foundation for Statistical Computing, Vienna, Austria.  
470 ISBN 3-900051-07-0, URL <http://R-project.org>. (2009).

## FIGURE CAPTIONS

**Figure 1 | A model of relic DNA dynamics.** **a** The amount of relic DNA in a microbial environment is determined by inputs associated with the mortality of viable individuals with intact DNA and by losses associated with the degradation of relic DNA. If the diversity of sequences contained in the relic DNA pool is sufficiently different from that in the intact DNA pool, then relic DNA may bias estimates of microbial biodiversity (as indicated by different colored boxes) when sampling from the total (intact + relic) DNA pool. We developed a sampling-based simulation model that created communities populated with individuals with intact DNA sampled from a lognormal species abundance distribution. We then mixed the intact community with relic individuals so that the relic contribution to total community ranged from 0.01 to 0.96. The relic community was also populated with individuals sampled from a lognormal species distribution, but which varied in **(b)** evenness ( $E$ ) or **(c)** richness ( $S$ ). To quantify bias in diversity, we calculated "richness ratios" which reflect the number of species in the total DNA pool (intact + relic) divided by the number of species in the intact DNA pool. When values richness ratios = 1, relic DNA has no effect on diversity; when richness ratios > 1, relic DNA leads to overestimates of diversity; richness ratios < 1, relic DNA lead to underestimation of diversity.

**Figure 2 | Proportion of bacterial relic DNA in different ecosystem types.** We quantified the amount of intact DNA in a sample after removing relic DNA with a DNase treatment. We then estimated the proportion of relic DNA as  $1 - (\text{intact DNA} / \text{total DNA})$ , where the total DNA concentration was quantified without DNase treatment. Relic DNA constituted an appreciable

portion of the total DNA pool, but was not affected by the ecosystem type from which the

sample was collected (gut, soil, sediment, and water). Data are represented as means  $\pm$  95% confidence intervals.

### **Figure 3 | Bias of relic DNA on within-sample bacterial diversity in different ecosystem**

**types. a-c** We tested for the effects of bias caused by relic DNA by calculating diversity ratios for (a) richness, (b) evenness, and (c) phylogenetic diversity. The ratios reflect the diversity of

the total DNA pool (intact + relic) divided by the diversity of the intact DNA pool. Relic DNA did not bias any measures of diversity in any of the ecosystem types. Data are represented as

means  $\pm$  95% confidence intervals. Richness was calculated as the number of operational taxonomic units (97% sequence similarity of the 16S rRNA gene), evenness was calculated using

Simpson's evenness index, and phylogenetic diversity was calculated using Faith's *D* index.



#### **Figure 4 | Bias of relic DNA on the among-sample bacterial diversity in different**

**ecosystem types. a-b** We tested for the effects of bias caused by relic DNA by calculating a beta-diversity ratio based on centroid distances. Centroid distances were estimated after performing Principle Coordinates Analyses (PCoA) using taxonomic (**a**) and phylogenetic (**b**) distance metrics (Bray-Curtis and UniFrac, respectively). The centroid distance ratio was calculated on each sample within an ecosystem type and reflects the composition of the total DNA pool (intact + relic) relative to the intact DNA pool. Relic DNA had no effect on beta-diversity for any of the ecosystem types sampled. Data are represented as means  $\pm$  95% confidence intervals.

508

**Fig. 1.**

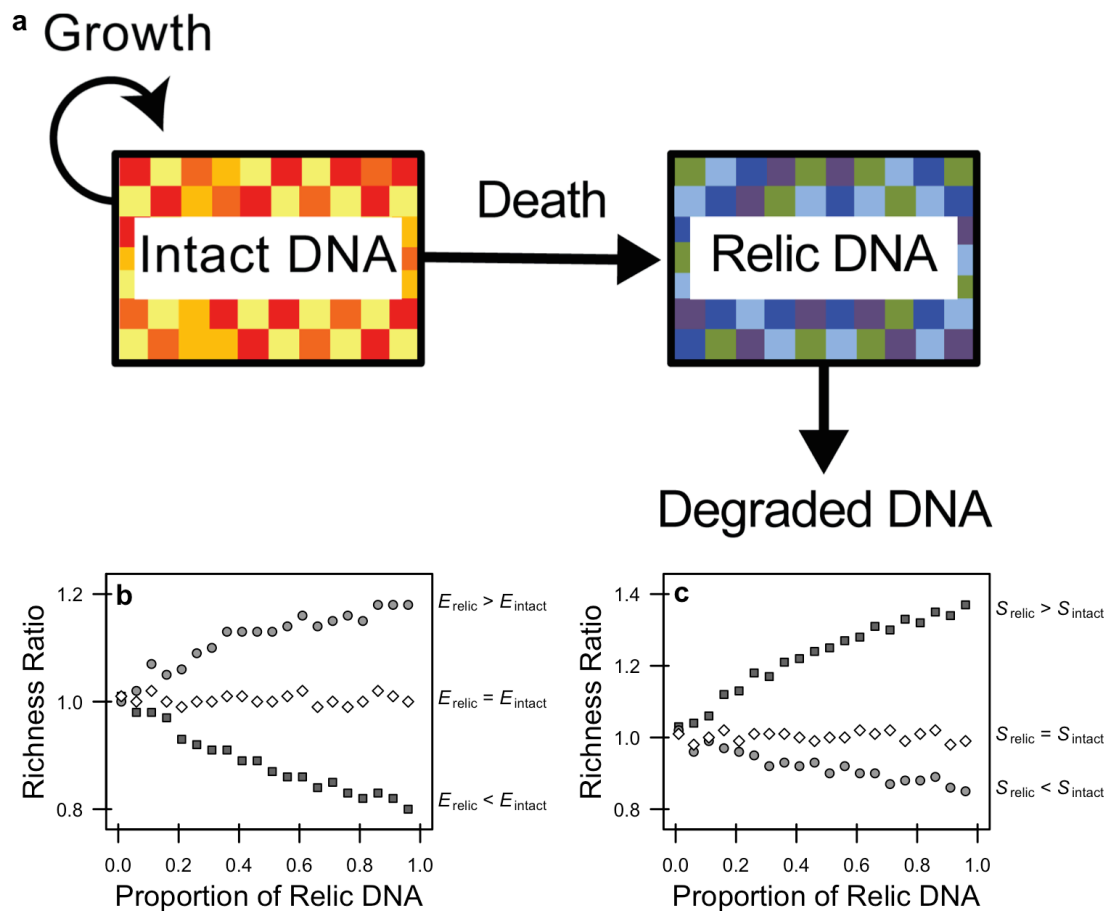

**Figure 1 | A model of relic DNA dynamics.** **a** The amount of relic DNA in a microbial environment is determined by inputs associated with the mortality of viable individuals with intact DNA and by losses associated with the degradation of relic DNA. If the diversity of sequences contained in the relic DNA pool is sufficiently different from that in the intact DNA pool, then relic DNA may bias estimates of microbial biodiversity (as indicated by different colored boxes) when sampling from the total (intact + relic) DNA pool. We developed a sampling-based simulation model that created communities populated with individuals with intact DNA sampled from a lognormal species abundance distribution. We then mixed the intact community with relic individuals so that the relic contribution to total community ranged from 0.01 to 0.96. The relic community was also populated with individuals sampled from a lognormal species distribution, but which varied in **(b)** evenness ( $E$ ) or **(c)** richness ( $S$ ). To quantify bias in diversity, we calculated "richness ratios" which reflect the number of species in the total DNA pool (intact + relic) divided by the number of species in the intact DNA pool. When values richness ratios = 1, relic DNA has no effect on diversity; when richness ratios > 1, relic DNA leads to overestimates of diversity; richness ratios < 1, relic DNA lead to underestimation of diversity.

Fig. 2.

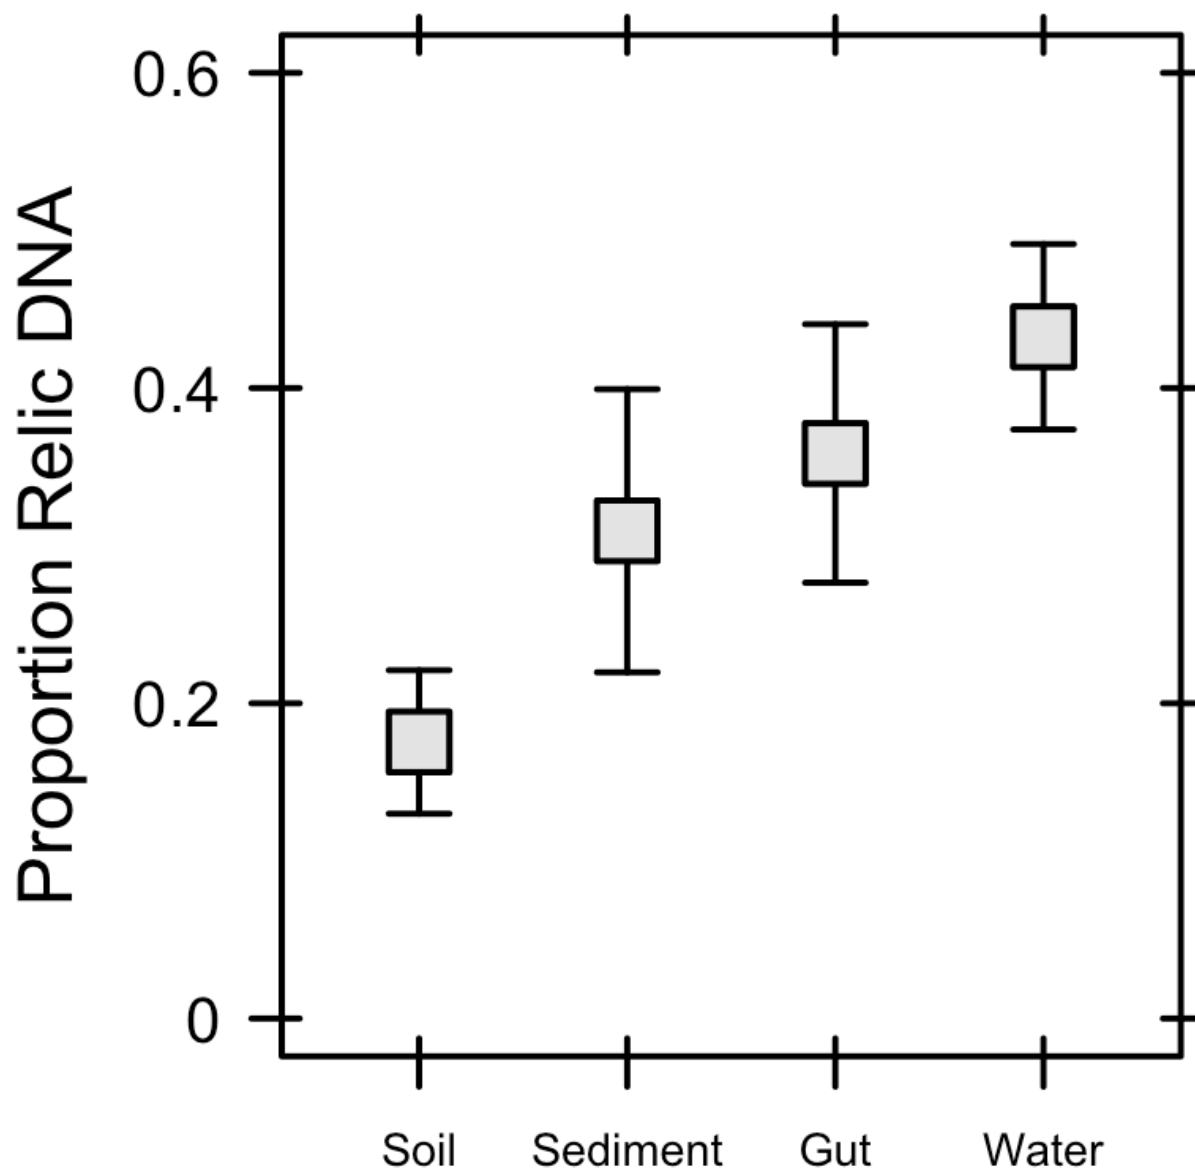

**Figure 2 | Proportion of bacterial relic DNA in different ecosystem types.** We quantified the amount of intact DNA in a sample after removing relic DNA with a DNase treatment. We then estimated the proportion of relic DNA as  $1 - (\text{intact DNA} / \text{total DNA})$ , where the total DNA concentration was quantified without DNase treatment. Relic DNA constituted an appreciable portion of the total DNA pool, but was not affected by the ecosystem type from which the sample was collected (gut, soil, sediment, and water). Data are represented as means  $\pm$  95% confidence intervals.

**Fig. 3.**

514

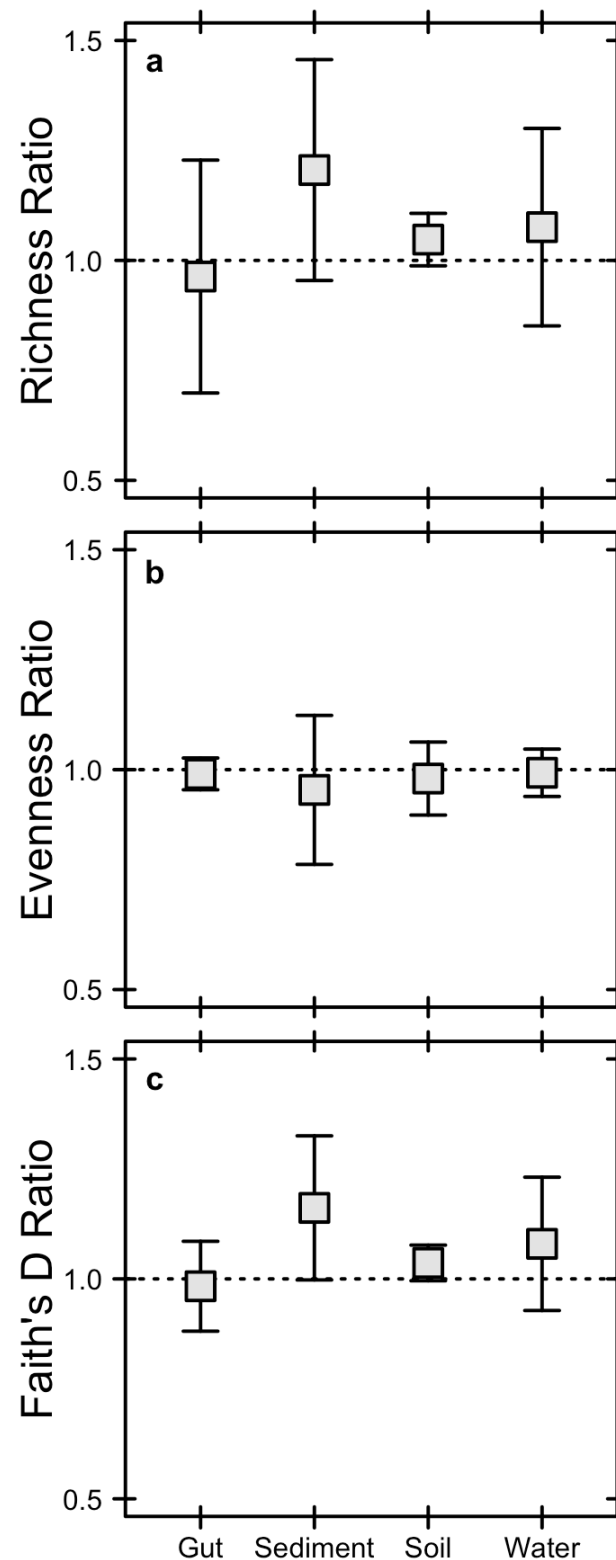

**Figure 3 | Bias of relic DNA on within-sample bacterial diversity in different ecosystem types. a-c** We tested for the effects of bias caused by relic DNA by calculating diversity ratios for (a) richness, (b) evenness, and (c) phylogenetic diversity. The ratios reflect the diversity of the total DNA pool (intact + relic) divided by the diversity of the intact DNA pool. Relic DNA did not bias any measures of diversity in any of the ecosystem types. Data are represented as means  $\pm$  95% confidence intervals. Richness was calculated as the number of operational taxonomic units (97% sequence similarity of the 16S rRNA gene), evenness was calculated using Simpson's evenness index, and phylogenetic diversity was calculated using Faith's *D* index.

**Fig. 4.**

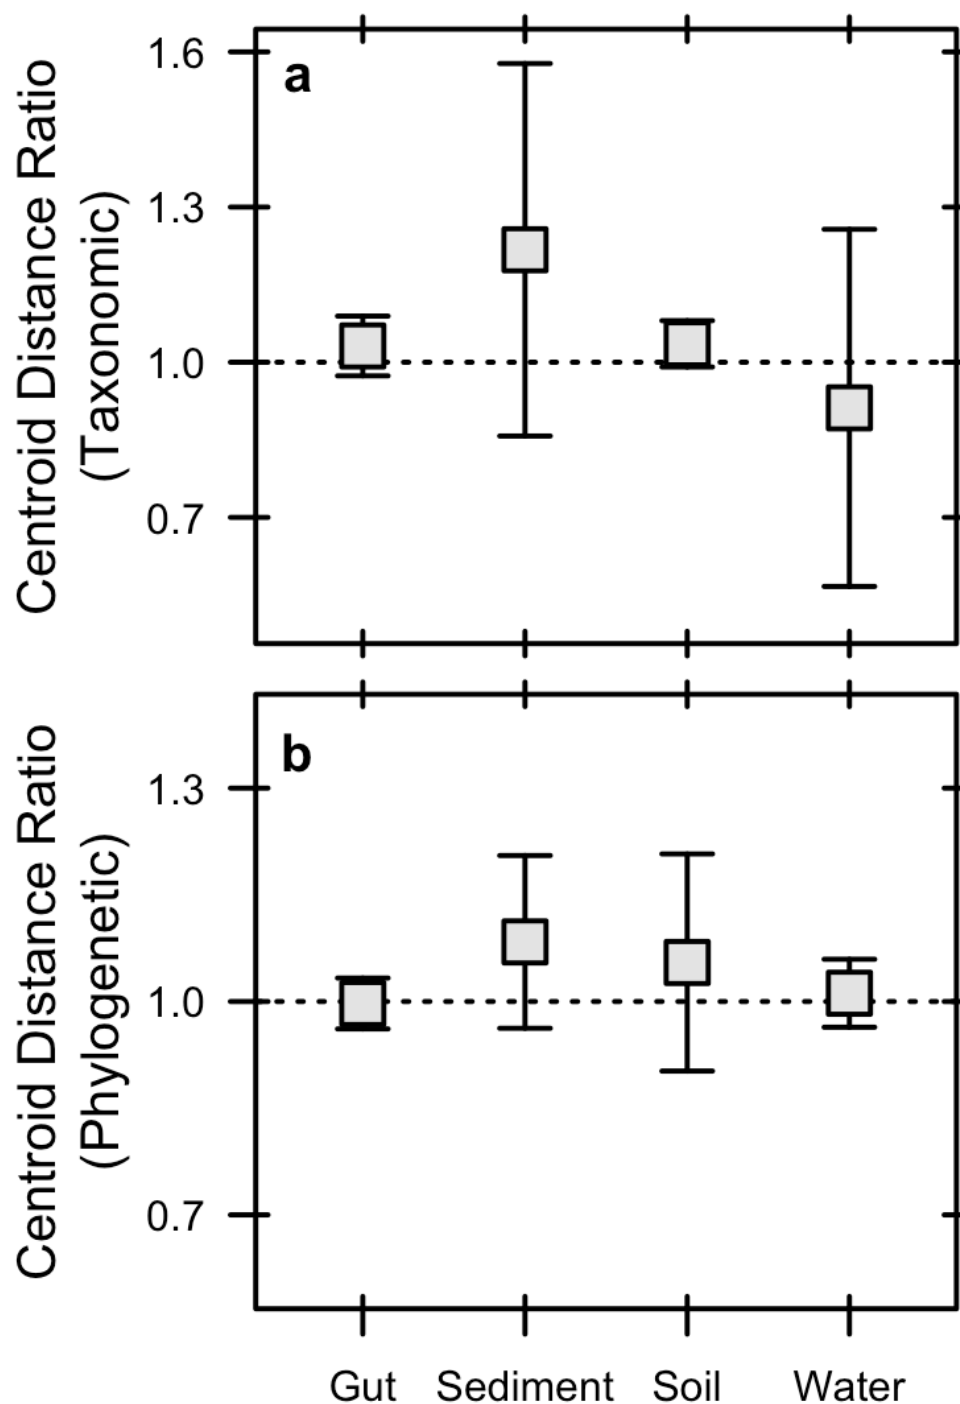

**Figure 4 | Bias of relic DNA on the among-sample bacterial diversity in different ecosystem types. a-b** We tested for the effects of bias caused by relic DNA by calculating a beta-diversity ratio based on centroid distances. Centroid distances were estimated after performing Principle Coordinates Analyses (PCoA) using taxonomic (a) and phylogenetic (b) distance metrics (Bray-Curtis and UniFrac, respectively). The centroid distance ratio was calculated on each sample within an ecosystem type and reflects the composition of the total DNA pool (intact + relic) relative to the intact DNA pool. Relic DNA had no effect on beta-diversity for any of the ecosystem types sampled. Data are represented as means  $\pm$  95% confidence intervals.
